# Supplementary material for: Antibiotic Resistance Determinant-Focused Acinetobacter baumannii Vaccine Designed Using Reverse Vaccinology
Source: Int J Mol Sci. 2017 Feb 21;18(2):458. doi: 10.3390/ijms18020458 (PMC5343991; doi:10.3390/ijms18020458)
Supplement: Supplementary file 1 [file ijms-18-00458-s001.xlsx]

## Sheet: Export
84 representative A.baumannii resistance determinants and their Vaxign analysis results
Subcellular Localization: Any
#	Protein Accession	Protein GI	Protein Note	Localization	Probability	Adhesin Probability	Trans-membrane helices	Similar Human Protein	Similar Mouse Protein	Similar Pig Protein	Protein Length
1	BAD34451.1		beta-lactamase CTX-M-2	Periplasmic	0.976	0.537	0				291
2	BAD34453.1		metallo-beta-lactamase IMP-19	Unknown	0.25	0.405	1				246
3	BAD89844.2		multidrug efflux pump AbeM	Cytoplasmic Membrane	1	0.164	12	Y		Y	448
4	AAA21890.1	141743	aminoglycoside acetyltransferase	Cytoplasmic	0.896	0.223	0				286
5	AAA87229.1	847647	aac(6')-Ik	Cytoplasmic	0.896	0.057	0				145
6	AAC41391.1	547387	aac(6')-Ih	Unknown	0.2	0.172	0				146
7	AAG01343.1	9864197	metallo-beta lactamase VIM-2	Unknown	0.2	0.285	0				266
9	AAK27847.1	13491139	blaIMP-5	Unknown	0.25	0.403	0				246
10	AAL68825.1	18390033	extended-spectrum beta-lactamase CTX-M-5, partial (plasmid)	Periplasmic	0.944	0.598	0				276
11	AAN34370.1	25044857	AacC2	Cytoplasmic	0.896	0.223	0				286
12	AAP20889.1	30230493	extended-spectrum beta-lactamase SHV-12	Periplasmic	0.976	0.185	0				286
13	AAP20890.1	30230495	extended-spectrum beta-lactamase SHV-48	Periplasmic	0.976	0.176	0				286
14	AAQ55480.1	33943602	beta-lactamase SHV-56	Periplasmic	0.976	0.210	0				286
15	AAQ57123.1	34099626	beta-lactamase TEM-128	Periplasmic	0.976	0.233	0				286
16	AAT51721.1	49073078	AAC(3)-Ia	Unknown	0.2	0.172	0				154
17	AAV38100.1	54661908	beta-lactamase SHV-1b	Periplasmic	0.976	0.194	0				286
18	AAX76774.1	62199049	metallo-beta-lactamase SIM-1	Unknown	0.25	0.350	0				246
20	AAZ14850.1	70905587	Sul1	Cytoplasmic	0.997	0.076	0				279
21	AAZ14955.1	70906550	beta-lactamase CTX-M-43	Periplasmic	0.976	0.548	0				291
22	AAZ76549.1	73486778	dihydrofolate reductase	Unknown	0.2	0.208	0	Y	Y	Y	165
23	ABA08399.1	74476644	DfrA1	Unknown	0.2	0.422	0				157
24	ABC24668.1	83583501	metallo-beta-lactamse IMP-4	Unknown	0.25	0.385	0				246
25	ABC25482.1	83596180	beta-lactamase SHV-71	Periplasmic	0.976	0.177	0				286
26	ABG82195.1	110672140	metallo-beta-lactamase IMP-8	Unknown	0.25	0.420	1				246
27	ABI20792.1	112785290	metallo-beta-lactamase VIM-11	Unknown	0.2	0.282	0				266
28	ABL95928.1	119698172	Aac6-II	Cytoplasmic	0.997	0.176	0				184
29	ABN48511.1	125634704	metallo-beta-lactamase IMP-1	Unknown	0.25	0.366	0				246
30	ABN49112.1	125658586	beta-lactamase SHV-96	Periplasmic	0.976	0.165	0				286
31	ABO12177.2	193077373	AdeB	Cytoplasmic Membrane	1	0.161	12				1036
32	ABO42026.1	133902722	AAC(3)-Ia aminoglycoside (3) acetyltransferase	Unknown	0.2	0.168	0				177
34	ABQ10556.1	146216708	extended-spectrum beta-lactamase PER-1	Cytoplasmic Membrane	0.982	0.378	0				308
35	ABS17646.1	151564626	VIM-1	Unknown	0.49	0.327	0				266
36	ABW70408.1	158518995	beta-lactamase SHV-5	Unknown	0.658	0.205	0				286
37	ABY56257.1	164449571	dihydrofolate reductase	Unknown	0.2	0.398	0				157
38	ABY56258.1	164449573	3-N-aminoglycoside acetyltransferase	Unknown	0.2	0.172	0				154
39	ACG63555.1	195976047	beta-lactamase SHV-18	Periplasmic	0.976	0.203	0				286
40	ACH73004.1	197725591	3'-aminoglycoside phosphotransferase type VI	Cytoplasmic	0.997	0.067	0				259
42	ACJ56282.1	213985983	Acriflavine resistance protein E precursor (Protein envC)	Cytoplasmic Membrane	0.982	0.252	0				396
43	ACJ61335.1	214011137	RTG-4	Periplasmic	0.976	0.384	0				298
44	ACN89661.1	225393064	chloramphenicol acetyltransferase	Unknown	0.2	0.146	0				210
45	ACO56763.1	226439459	beta-lactamase VEB-7	Periplasmic	0.944	0.354	0				299
47	ADB64519.1	284019441	QnrA1	Extracellular	0.945	0.330	0				218
48	AEQ20897.1	350064352	CTX-M15	Periplasmic	0.999	0.427	0				291
49	AFA35105.1	375108293	AmpC	Periplasmic	1	0.367	0				383
50	AFC75523.1	378939967	beta-lactamase TEM 193	Periplasmic	0.976	0.207	0				286
51	AFC75524.1	378939969	beta-lactamase TEM 194	Periplasmic	0.976	0.212	0				286
52	AFC75525.1	378939971	beta-lactamase TEM 195	Periplasmic	0.976	0.212	0				286
53	AFN21551.1	393718031	beta-lactamase TEM-19	Periplasmic	0.976	0.234	0				286
54	AGW28875.1	545346750	TEM-1 beta-lactamase	Periplasmic	0.976	0.226	0				286
55	AJF82689.1	751413528	CarO	Unknown	0.25	0.660	0				246
56	AKA31664.1	787860709	multidrug resistance efflux pump	Cytoplasmic Membrane	0.788	0.242	1				361
57	ALJ86898.1	939560725	Polymyxin resistance protein ArnT	Cytoplasmic Membrane	1	0.149	12				548
58	AMB18971.1	982894811	extended spectrum beta-lactamase TEM-116	Periplasmic	0.976	0.251	1				291
60	CAM86705.1	169148836	membrane fusion protein	Cytoplasmic Membrane	0.982	0.235	0				399
61	CAM86706.1	169148837	RND protein	Cytoplasmic Membrane	1	0.160	12				1036
62	CAM88361.1	169150461	Aminoglycoside 3'-phosphotransferase AphA1-IAB	Cytoplasmic Membrane	0.846	0.099	0				271
63	CAM88375.1	169150475	Tetracycline resistance protein, class A (TETA(A))	Cytoplasmic Membrane	1	0.178	12	Y	Y	Y	424
64	CAM88389.1	169150487	Dihydrofolate reductase type A10 (Dihydrofolate reductase type X) (DHFRX)	Unknown	0.2	0.436	0				187
65	CAM88394.1	169150492	Beta-lactamase OXA-10 precursor	Unknown	0.25	0.493	0				266
66	CAM88395.1	169150493	Chloramphenicol resistance protein	Cytoplasmic Membrane	1	0.143	12				419
67	CAM88398.1	169150496	Extended spectrum beta-lactamase VEB-1	Unknown	0.658	0.368	1				299
68	CAM88407.1	169150503	Tetracycline resistance protein, class G (TETA(G))	Cytoplasmic Membrane	1	0.309	10	Y	Y	Y	391
69	CAM88409.1	169150505	putative Chloramphenicol and florfenicol resistance protein (CmlA)	Cytoplasmic Membrane	1	0.204	12				404
70	CAM88415.1	169150509	Streptomycin 3''-kinase (Streptomycin 3''-phosphotransferase) (SPH)	Cytoplasmic	0.997	0.224	0				278
71	CAO78558.1	157101035	oxacillinase	Unknown	0.25	0.214	0				275
72	EYD25947.1	598577446	beta-lactamase SHV-2	Unknown	0.658	0.167	0				286
73	KRU01090.1	952961454	multidrug resistance protein B	Cytoplasmic Membrane	1	0.224	14				507
74	KRU07520.1	952968003	EmrB/QacA subfamily drug resistance transporter	Cytoplasmic Membrane	1	0.198	14				463
75	SBS20176.1	1036116169	Acr family drug resistance transporter,Cation efflux system protein CzcA,multidrug efflux protein,heavy metal efflux pump, CzcA family,AcrB/AcrD/AcrF family	Cytoplasmic Membrane	1	0.165	12				1041
76	SBS21028.1	1036117021	MFS family drug transporter,Sulfonamide resistance protein,bicyclomycin/multidrug efflux system,Arabinose efflux permease,drug resistance transporter, Bcr/CflA subfamily,Major Facilitator Superfamily	Cytoplasmic Membrane	1	0.273	12				401
77	SBS21349.1	1036117342	QacEdelta1 SMR family efflux pump,Methyl viologen resistance protein C,multidrug efflux protein,Membrane transporters of cations and cationic drugs,Small Multidrug Resistance protein [Acinetobacter ba	Cytoplasmic Membrane	1	0.187	3				109
78	SBS21927.1	1036117920	multidrug resistance efflux pump,Inner membrane protein yibH,multidrug efflux system protein EmrA,efflux pump membrane protein,HlyD family secretion protein	Cytoplasmic Membrane	0.788	0.235	1				362
79	WP_000018327.1	445940472	YP_001844878.1| hypothetical protein [Acinetobacter baumannii]record removed	Outer Membrane	0.993	0.533	0				469
80	WP_000045119.1	445967264	adeC/adeK/oprM family multidrug efflux complex outer membrane factor	Outer Membrane	1	0.339	0				465
81	WP_000946490.1	446869234	MULTISPECIES: AAC(6')-Ib family aminoglycoside 6'-N-acetyltransferase	Cytoplasmic	0.926	0.181	0				210
82	WP_000976520.1	446899264	MULTISPECIES: membrane protein	Unknown	0.25	0.478	1				356
83	WP_001169096.1	447091840	AdeA/AdeI family multidrug efflux RND transporter periplasmic adaptor subunit	Cytoplasmic Membrane	0.982	0.252	0				396
86	WP_039249963.1	746191810	Bcr/CflA family drug resistance efflux transporter	Cytoplasmic Membrane	1	0.246	12				404
87	YP_001715319.1	169797526	dihydropteroate synthase |WP_000259031.1|	Cytoplasmic	0.997	0.076	0				279
88	YP_001736307.1	170780388	OXA-58 oxacillinase (plasmid)	Unknown	0.25	0.225	0				280
89	YP_002967455.1	240887308	OXA-24 class D beta-lactamase (plasmid)	Unknown	0.2	0.290	0				275
90	YP_006962491.1	412336985	aminoglycoside (2') adenyltransferase AadB or AAD(2')-1a (plasmid)	Cytoplasmic	0.896	0.189	0				177
91	YP_007652796.1	471815713	beta-lactamase NDM-1 (plasmid)	Unknown	0.2	0.478	0				270
92	YP_009066594.1	690330115	class D beta-lactamase OXA-23 (plasmid)	Unknown	0.2	0.284	0				273
